# Supplementary material for: Physical Activity Levels and Predictors during COVID-19 Lockdown among Lebanese Adults: The Impacts of Sociodemographic Factors, Type of Physical Activity and Work Location
Source: MDPI journal article supplement (doi:10.3390/healthcare11142080), 2023-07-21
Supplement: s1 [file s1]

## Supplementary material

### Physical Activity Levels and Predictors during COVID-19 Lockdown among Lebanese Adults: The Impacts of Sociodemographic Factors, Type of Physical Activity and Work Location

#### Table of content

| Content                                                                                                                                                                      | Page   |
|------------------------------------------------------------------------------------------------------------------------------------------------------------------------------|--------|
| <b>Table S1</b> PA (IPAQ) characteristics according to sex                                                                                                                   | S2     |
| <b>Table S2</b> Association between age and PA                                                                                                                               | S4     |
| <b>Table S3</b> Spearman correlation coefficient between age and PA domain assessed by the IPAQ                                                                              | S6     |
| <b>Figure S1</b> showing categories of Total and Leisure PA ( $\geq$ and $<600$ MET.min/week) according to age groups                                                        | S7     |
| <b>Figure S2</b> showing categories of Total and walking-related PA ( $\geq$ and $<600$ MET.min/week) according to work location during lockdown                             | S8     |
| <b>Table S4</b> Association between PA levels & intensity (as measured by IPAQ) and work location during lockdown among participants with BMI $<25\text{Kg/m}^2$ (n=524)     | S9     |
| <b>Table S5</b> Association between PA levels & intensity (as measured by IPAQ) and work location during lockdown among participants with BMI $\geq 25\text{Kg/m}^2$ (n=269) | S10    |
| <b>Table S6</b> Association between PA levels & intensity (as measured by IPAQ) and BMI categories during lockdown                                                           | S11-12 |
| <b>Table S7</b> Association between PA levels & intensity (as measured by IPAQ) and type of PA during lockdown                                                               | S13-14 |
| <b>Figure S3</b> Categories of total and leisure PA ( $\geq$ and $<600$ MET.min/week) according to type of PA during lockdown                                                | S15    |
| <b>Table S8</b> Association between age and type of PA during lockdown                                                                                                       | S16    |

**Table S1.** PA (IPAQ) characteristics according to sex

|                                 | <b>Men</b>     | <b>Women</b>   | <b>Total</b> | <b><i>p</i>-value</b> |
|---------------------------------|----------------|----------------|--------------|-----------------------|
|                                 | <b>n = 218</b> | <b>n = 577</b> | <b>n=795</b> | <b>*</b>              |
| Total PA level n (%)            |                |                |              | 0.865                 |
| <600 MET.min/week               | 80 (36.7)      | 208 (36.0)     | 288 (36.2)   |                       |
| ≥600 MET.min/week               | 138 (63.3)     | 369 (64.0)     | 507 (63.8)   |                       |
| Job-related PA n (%)            |                |                |              | 0.048                 |
| <600 MET.min/week               | 187 (85.8)     | 523 (90.6)     | 710 (89.3)   |                       |
| ≥600 MET.min/week               | 31 (14.2)      | 54 (9.4)       | 85 (10.7)    |                       |
| Transportation-related PA n (%) |                |                |              | 0.249                 |
| <600 MET.min/week               | 184 (84.4)     | 505 (87.5)     | 689 (86.7)   |                       |
| ≥600 MET.min/week               | 34 (15.6)      | 72 (12.5)      | 106 (13.3)   |                       |
| Housework-related PA n (%)      |                |                |              | 0.002                 |
| <600 MET.min/week               | 161 (73.9)     | 360 (62.4)     | 521 (65.5)   |                       |
| ≥600 MET.min/week               | 57 (26.1)      | 217 (37.6)     | 274 (34.5)   |                       |
| Leisure-related PA n (%)        |                |                |              | 0.226                 |
| <600 MET.min/week               | 139 (63.8)     | 394 (68.3)     | 533 (67.0)   |                       |
| ≥600 MET.min/week               | 79 (36.2)      | 183 (31.7)     | 262 (33.0)   |                       |
| Walking n (%)                   |                |                |              | 0.697                 |
| <600 MET.min/week               | 148 (67.9)     | 400 (69.3)     | 548 (68.9)   |                       |
| ≥600 MET.min/week               | 70 (32.1)      | 177 (30.7)     | 247 (31.1)   |                       |
| Moderate PA n (%)               |                |                |              | 0.164                 |
| <600 MET.min/week               | 147 (67.4)     | 418 (72.4)     | 565 (71.1)   |                       |
| ≥600 MET.min/week               | 71 (32.6)      | 159 (27.6)     | 230 (28.9)   |                       |
| Vigorous PA n (%)               |                |                |              | 0.152                 |

|                          |            |            |            |       |
|--------------------------|------------|------------|------------|-------|
| <600 MET.min/week        | 145 (66.5) | 352 (61.0) | 497 (62.5) |       |
| ≥600 MET.min/week        | 73 (33.5)  | 225 (39.0) | 298 (37.5) |       |
| Sitting time (hours/day) |            |            |            | 0.046 |
| Tertile 1 = ≤6.29 h      | 53 (26.6)  | 192 (36.2) | 245 (30.8) |       |
| Tertile 2 = 6.29-10 h    | 81 (40.7)  | 180 (33.9) | 261 (32.8) |       |
| Tertile 3 = >10 h        | 65 (32.7)  | 159 (29.9) | 224 (28.2) |       |

\*Statistical Test: Chi-square test;  $p < 0.05$  was considered as significant; PA, Physical activity; MET, metabolic equivalent task; Total PA level (MET-minutes/week) = Total physical activity MET-minutes/week = sum of (Job PA + Transportation PA + Housework PA + Leisure PA MET-minutes/week scores).

**Table S2.** Association between age and PA

|                                 | <b>&lt;23 years</b> | <b>23-40 years</b> | <b>≥ 40 years</b> | <b><i>p</i>-value</b> |
|---------------------------------|---------------------|--------------------|-------------------|-----------------------|
|                                 | <b>n = 302</b>      | <b>n = 241</b>     | <b>n=252</b>      | <b>*</b>              |
| Total PA level n (%)            |                     |                    |                   | <0.001                |
| <600 MET.min/week               | 142 (47.0)          | 92 (38.2)          | 54 (21.4)         |                       |
| ≥600 MET.min/week               | 160 (53.0)          | 149 (61.8)         | 198 (78.6)        |                       |
| Job-related PA n (%)            |                     |                    |                   | <0.001                |
| <600 MET.min/week               | 295 (97.7)          | 197 (81.7)         | 218 (86.5)        |                       |
| ≥600 MET.min/week               | 7 (2.3)             | 44 (18.3)          | 34 (13.5)         |                       |
| Transportation-related PA n (%) |                     |                    |                   | 0.004                 |
| <600 MET.min/week               | 267 (88.4)          | 218 (90.5)         | 204 (81.0)        |                       |
| ≥600 MET.min/week               | 35 (11.6)           | 23 (9.5)           | 48 (19.0)         |                       |
| Housework-related PA n (%)      |                     |                    |                   | <0.001                |
| <600 MET.min/week               | 213 (70.5)          | 171 (71.0)         | 137 (54.4)        |                       |
| ≥600 MET.min/week               | 89 (29.5)           | 70 (29.0)          | 115 (45.6)        |                       |
| Leisure-related PA n (%)        |                     |                    |                   | 0.008                 |
| <600 MET.min/week               | 215 (71.2)          | 168 (69.7)         | 150 (59.5)        |                       |
| ≥600 MET.min/week               | 87 (28.8)           | 73 (30.3)          | 102 (40.5)        |                       |
| Walking n (%)                   |                     |                    |                   | <0.001                |
| <600 MET.min/week               | 237 (78.5)          | 163 (67.6)         | 148 (58.7)        |                       |
| ≥600 MET.min/week               | 65 (21.5)           | 78 (32.4)          | 104 (41.3)        |                       |
| Moderate PA n (%)               |                     |                    |                   | 0.057                 |
| <600 MET.min/week               | 228 (75.5)          | 170 (70.5)         | 167 (66.3)        |                       |
| ≥600 MET.min/week               | 74 (24.5)           | 71 (29.5)          | 85 (33.7)         |                       |

|                          |            |            |            |        |
|--------------------------|------------|------------|------------|--------|
| Vigorous PA n (%)        |            |            |            | <0.001 |
| <600 MET.min/week        | 214 (70.9) | 156 (64.7) | 127 (50.4) |        |
| 600-3000 MET.min/week    | 88 (29.1)  | 85 (35.3)  | 125 (49.6) |        |
| Sitting time (hours/day) |            |            |            | <0.001 |
| Tertile 1 = ≤6.29 h      | 56 (20.8)  | 68 (31.1)  | 121 (50.0) |        |
| Tertile 2 = 6.29-10 h    | 105 (39.0) | 84 (38.4)  | 72 (29.8)  |        |
| Tertile 3 = >10 h        | 108 (40.1) | 67 (30.6)  | 49 (20.2)  |        |

\*Statistical Test: Chi-square test;  $p < 0.05$  was considered as significant; PA, Physical activity; MET, metabolic equivalent task; Total PA level (MET-minutes/week) = Total physical activity MET-minutes/week = sum of (Job PA + Transportation PA + Housework PA + Leisure PA MET-minutes/week scores).

**Table S3 Spearman correlation coefficient between age and PA domain assessed by the IPAQ**

|                           | <i>r</i> | <i>p</i> |
|---------------------------|----------|----------|
| Total PA                  | 0.212    | <0.001   |
| Job-related PA            | 0.203    | <0.001   |
| Transportation-related PA | 0.110    | 0.002    |
| Housework-related PA      | 0.122    | 0.001    |
| Leisure-related PA        | 0.102    | 0.004    |
| Walking                   | 0.214    | <0.001   |
| Moderate PA               | 0.043    | 0.227    |
| Vigorous PA               | 0.190    | <0.001   |
| Sitting time (hours/day)  | -0.294   | <0.001   |

r: Spearman correlation coefficient;  $p < 0.05$  was considered as significant; PA: physical activity

**Figure S1** showing categories of Total and Leisure PA ( $\geq$  and  $<600$  MET.min/week) according to age groups: participants aged  $\geq 40$  years showed the highest PA levels,  $p < 0.01$  for Total PA and Leisure PA

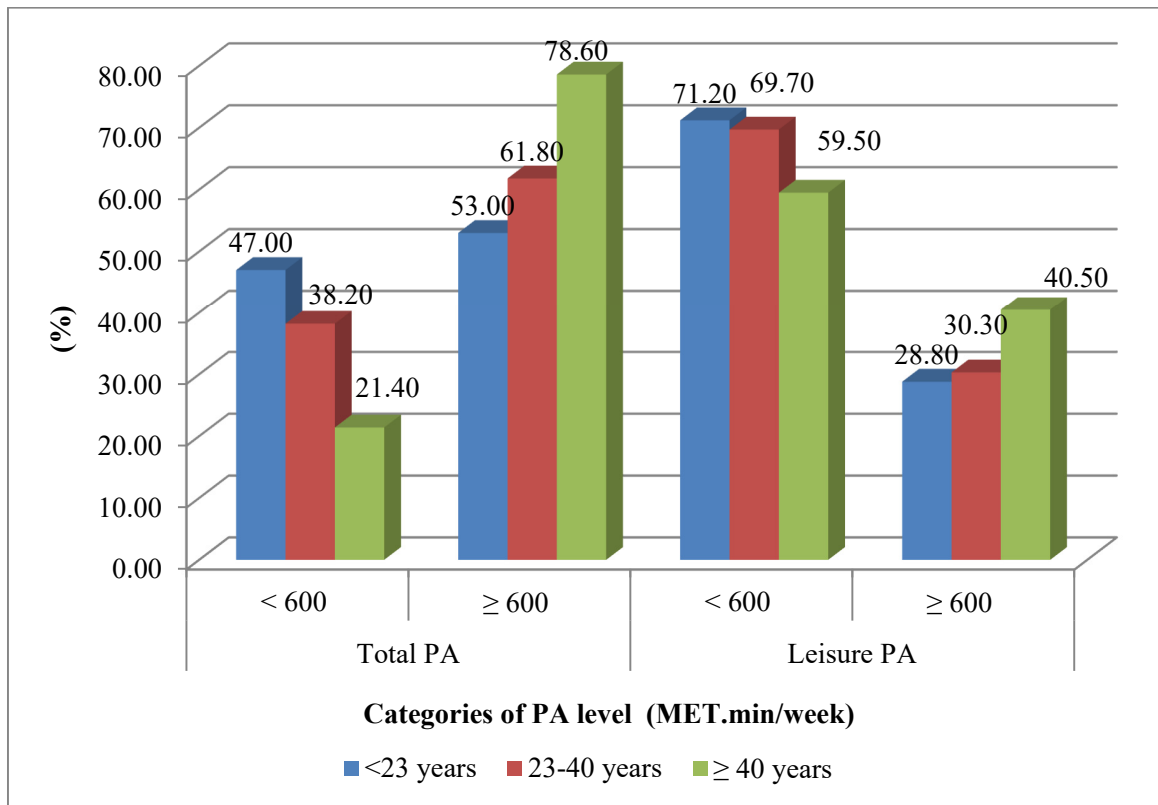

**Figure S2** showing categories of Total and walking-related PA ( $\geq$  and  $<600$  MET.min/week) according to work location during lockdown

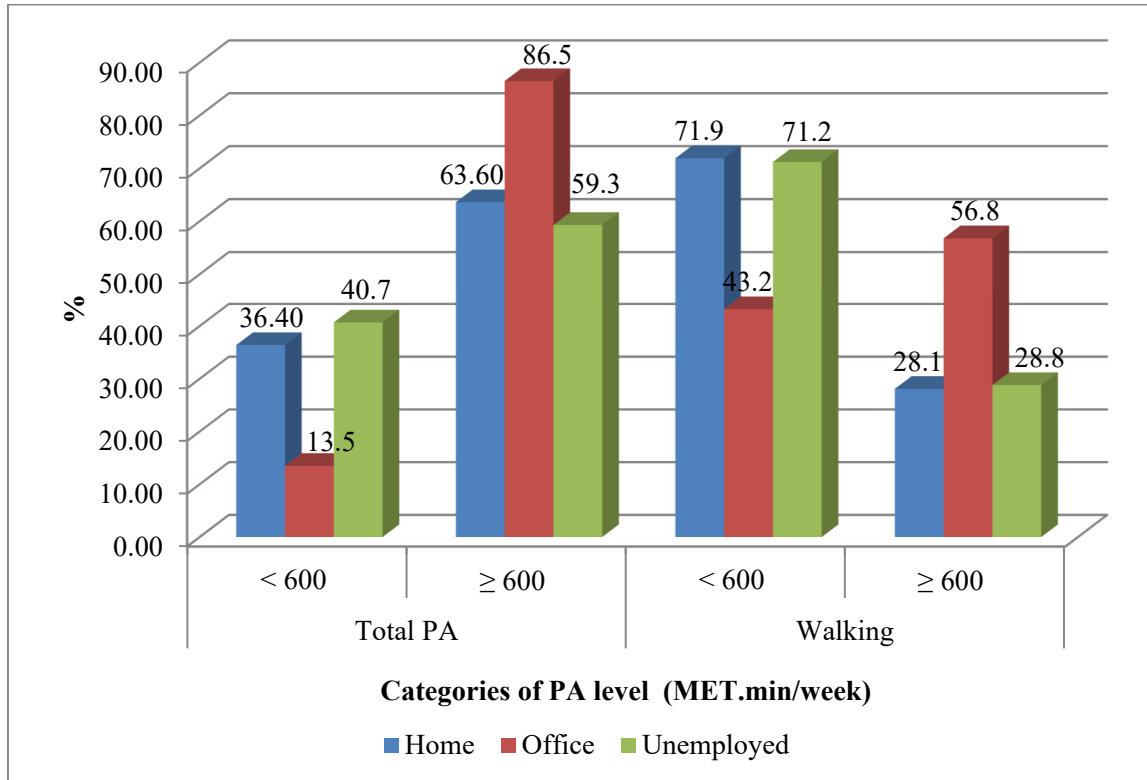



**Table S4** Association between PA levels & intensity (as measured by IPAQ) and work location during lockdown among participants with BMI <25Kg/m<sup>2</sup> (n=524)

|                                 | Home<br>(n=237) | Office<br>(n=45) | Student /<br>Unemployed<br>(n=242) | <i>p</i> -value |
|---------------------------------|-----------------|------------------|------------------------------------|-----------------|
| Total PA level n (%)            |                 |                  |                                    | <0.001          |
| <600 MET.min/week               | 91 (38.4)       | 5 (11.1)         | 103 (42.6)                         |                 |
| ≥600 MET.min/week               | 146 (61.6)      | 40 (88.9)        | 139 (57.4)                         |                 |
| Job-related PA n (%)            |                 |                  |                                    | <0.001          |
| <600 MET.min/week               | 225 (94.9)      | 13 (28.9)        | 237 (97.9)                         |                 |
| ≥600 MET.min/week               | 12 (5.1)        | 32 (71.1)        | 5 (2.1)                            |                 |
| Transportation-related PA n (%) |                 |                  |                                    | 0.429           |
| <600 MET.min/week               | 212 (89.5)      | 39 (86.7)        | 207 (85.5)                         |                 |
| ≥600 MET.min/week               | 25 (10.5)       | 6 (13.3)         | 35 (14.5)                          |                 |
| Housework-related PA n (%)      |                 |                  |                                    | 0.989           |
| <600 MET.min/week               | 160 (67.5)      | 30 (66.7)        | 164 (67.8)                         |                 |
| ≥600 MET.min/week               | 77 (32.5)       | 15 (33.3)        | 78 (32.2)                          |                 |
| Leisure-related PA n (%)        |                 |                  |                                    | 0.124           |
| <600 MET.min/week               | 155 (65.4)      | 26 (57.8)        | 173 (71.5)                         |                 |
| ≥600 MET.min/week               | 82 (34.6)       | 19 (42.2)        | 69 (28.5)                          |                 |
| Walking n (%)                   |                 |                  |                                    | <0.001          |
| <600 MET.min/week               | 174 (73.4)      | 13 (28.9)        | 178 (73.6)                         |                 |
| ≥600 MET.min/week               | 63 (26.6)       | 32 (71.1)        | 64 (26.4)                          |                 |
| Moderate PA n (%)               |                 |                  |                                    | 0.001           |
| <600 MET.min/week               | 175 (73.8)      | 22 (48.9)        | 181 (74.8)                         |                 |
| ≥600 MET.min/week               | 62 (26.2)       | 23 (51.1)        | 61 (25.2)                          |                 |
| Vigorous PA n (%)               |                 |                  |                                    | 0.202           |
| <600 MET.min/week               | 159 (67.1)      | 24 (53.3)        | 159 (65.7)                         |                 |
| ≥600 MET.min/week               | 78 (32.9)       | 21 (46.7)        | 83 (34.3)                          |                 |
| Sitting time (hours/day)        |                 |                  |                                    | 0.002           |
| Tertile 1 = ≤6.29 h             | 67 (29.4)       | 23 (53.5)        | 65 (30.5)                          |                 |
| Tertile 2 = 6.29-10 h           | 71 (31.1)       | 16 (37.2)        | 76 (35.7)                          |                 |
| Tertile 3 = >10 h               | 90 (39.5)       | 4 (9.3)          | 72 (33.8)                          |                 |

*p*<0.05 was considered as significant; PA, Physical activity; MET, metabolic equivalent task; Total PA level (MET-minutes/week) = Total physical activity MET-minutes/week = sum of (Job PA + Transportation PA + Housework PA + Leisure PA MET-minutes/week scores).

**Table S5** Association between PA levels & intensity (as measured by IPAQ) and work location during lockdown among participants with BMI  $\geq 25$  Kg/m<sup>2</sup> (n=269)

|                                 | Home<br>(n=122) | Office<br>(n=29) | Student /<br>Unemployed<br>(n=118) | <i>p</i> -value |
|---------------------------------|-----------------|------------------|------------------------------------|-----------------|
| Total PA level n (%)            |                 |                  |                                    | 0.142           |
| <600 MET.min/week               | 40 (32.8)       | 5 (17.2)         | 43 (36.4)                          |                 |
| $\geq 600$ MET.min/week         | 82 (67.2)       | 24 (82.8)        | 75 (63.6)                          |                 |
| Job-related PA n (%)            |                 |                  |                                    | <0.001          |
| <600 MET.min/week               | 102 (83.6)      | 16 (55.2)        | 116 (98.3)                         |                 |
| $\geq 600$ MET.min/week         | 20 (16.4)       | 13 (44.8)        | 2 (1.7)                            |                 |
| Transportation-related PA n (%) |                 |                  |                                    | 0.155           |
| <600 MET.min/week               | 109 (89.3)      | 25 (86.2)        | 95 (80.5)                          |                 |
| $\geq 600$ MET.min/week         | 13 (10.7)       | 4 (13.8)         | 23 (19.5)                          |                 |
| Housework-related PA n (%)      |                 |                  |                                    | 0.897           |
| <600 MET.min/week               | 73 (59.8)       | 18 (62.1)        | 74 (62.7)                          |                 |
| $\geq 600$ MET.min/week         | 49 (40.2)       | 11 (37.9)        | 44 (37.3)                          |                 |
| Leisure-related PA n (%)        |                 |                  |                                    | 0.431           |
| <600 MET.min/week               | 81 (66.4)       | 16 (55.2)        | 80 (67.8)                          |                 |
| $\geq 600$ MET.min/week         | 41 (33.6)       | 13 (44.8)        | 38 (32.2)                          |                 |
| Walking n (%)                   |                 |                  |                                    | 0.812           |
| <600 MET.min/week               | 85 (69.7)       | 19 (65.5)        | 78 (66.1)                          |                 |
| $\geq 600$ MET.min/week         | 37 (30.3)       | 10 (34.5)        | 40 (33.9)                          |                 |
| Moderate PA n (%)               |                 |                  |                                    | 0.006           |
| <600 MET.min/week               | 80 (65.6)       | 14 (48.3)        | 91 (77.1)                          |                 |
| $\geq 600$ MET.min/week         | 42 (34.4)       | 15 (51.7)        | 27 (22.9)                          |                 |
| Vigorous PA n (%)               |                 |                  |                                    | 0.236           |
| <600 MET.min/week               | 66 (54.1)       | 14 (48.3)        | 74 (62.7)                          |                 |
| $\geq 600$ MET.min/week         | 56 (45.9)       | 15 (51.7)        | 44 (37.3)                          |                 |
| Sitting time (hours/day)        |                 |                  |                                    | 0.018           |
| Tertile 1 = $\leq 6.29$ h       | 39 (35.1)       | 9 (37.5)         | 46 (42.2)                          |                 |
| Tertile 2 = 6.29-10 h           | 40 (36.0)       | 12 (50.0)        | 23 (21.1)                          |                 |
| Tertile 3 = $>10$ h             | 32 (28.8)       | 3 (12.5)         | 40 (36.7)                          |                 |

*p*<0.05 was considered as significant; PA, Physical activity; MET, metabolic equivalent task; Total PA level (MET-minutes/week) = Total physical activity MET-minutes/week = sum of (Job PA + Transportation PA + Housework PA + Leisure PA MET-minutes/week scores).

**Table S6** Association between PA levels & intensity (as measured by IPAQ) and BMI categories during lockdown

|                                 | BMI categories (Kg/m <sup>2</sup> ) |                       |                     |               | <i>p</i> -value |
|---------------------------------|-------------------------------------|-----------------------|---------------------|---------------|-----------------|
|                                 | <18.5<br>(n=62)                     | 18.5-24.99<br>(n=462) | 25-29.99<br>(n=208) | ≥30<br>(n=61) |                 |
| Total PA level n (%)            |                                     |                       |                     |               | 0.208           |
| <600 MET.min/week               | 25 (40.3)                           | 174 (37.7)            | 73 (35.1)           | 15 (24.6)     |                 |
| ≥600 MET.min/week               | 37 (59.7)                           | 288 (62.3)            | 135 (64.9)          | 46 (75.4)     |                 |
| Job-related PA n (%)            |                                     |                       |                     |               | 0.077           |
| <600 MET.min/week               | 58 (93.5)                           | 417 (90.3)            | 185 (88.9)          | 49 (80.3)     |                 |
| ≥600 MET.min/week               | 4 (6.5)                             | 45 (9.7)              | 23 (11.1)           | 12 (19.7)     |                 |
| Transportation-related PA n (%) |                                     |                       |                     |               | 0.849           |
| <600 MET.min/week               | 54 (87.1)                           | 404 (87.4)            | 177 (85.1)          | 52 (85.2)     |                 |
| ≥600 MET.min/week               | 8 (12.9)                            | 58 (12.6)             | 31 (14.9)           | 9 (14.8)      |                 |
| Housework-related PA n (%)      |                                     |                       |                     |               | 0.290           |
| <600 MET.min/week               | 39 (62.9)                           | 315 (68.2)            | 127 (61.1)          | 38 (62.3)     |                 |
| ≥600 MET.min/week               | 23 (37.1)                           | 147 (31.8)            | 81 (38.9)           | 23 (37.7)     |                 |
| Leisure-related PA n (%)        |                                     |                       |                     |               | 0.793           |
| <600 MET.min/week               | 42 (67.7)                           | 312 (67.5)            | 134 (64.4)          | 43 (70.5)     |                 |
| ≥600 MET.min/week               | 20 (32.3)                           | 150 (32.5)            | 74 (35.6)           | 18 (29.5)     |                 |
| Walking n (%)                   |                                     |                       |                     |               | 0.663           |
| <600 MET.min/week               | 47 (75.8)                           | 318 (68.8)            | 141 (67.8)          | 41 (67.2)     |                 |
| ≥600 MET.min/week               | 15 (24.2)                           | 144 (31.2)            | 67 (32.2)           | 20 (32.8)     |                 |
| Moderate PA n (%)               |                                     |                       |                     |               | 0.544           |
| <600 MET.min/week               | 43 (69.4)                           | 335 (72.5)            | 146 (70.2)          | 39 (63.9)     |                 |

|                          |           |            |            |           |       |
|--------------------------|-----------|------------|------------|-----------|-------|
| ≥600 MET.min/week        | 19 (30.6) | 127 (27.5) | 62 (29.8)  | 22 (36.1) |       |
| Vigorous PA n (%)        |           |            |            |           | 0.161 |
| <600 MET.min/week        | 39 (62.9) | 303 (65.6) | 118 (56.7) | 36 (59.0) |       |
| ≥600 MET.min/week        | 23 (37.1) | 159 (34.4) | 90 (43.3)  | 25 (41.0) |       |
| Sitting time (hours/day) |           |            |            |           | 0.400 |
| Tertile 1 = ≤6.29 h      | 13 (22.8) | 142 (33.3) | 71 (37.4)  | 23 (42.6) |       |
| Tertile 2 = 6.29-10 h    | 23 (40.4) | 140 (32.8) | 59 (31.1)  | 16 (29.6) |       |
| Tertile 3 = >10 h        | 21 (36.8) | 145 (34.0) | 60 (31.6)  | 15 (27.8) |       |

$p < 0.05$  was considered as significant; PA, Physical activity; MET, metabolic equivalent task; Total PA level (MET-minutes/week) = Total physical activity MET-minutes/week = sum of (Job PA + Transportation PA + Housework PA + Leisure PA MET-minutes/week scores).

**Table S7 Association between PA levels & intensity (as measured by IPAQ) and type of PA during lockdown**

|                                 | <b>At-home workouts<br/>(n=193)</b> | <b>Outdoor activities<br/>(n=191)</b> | <b>At-home and outdoor activities<br/>(n=139)</b> | <b>No PA<br/>(n=272)</b> | <b><i>p</i>-value</b> |
|---------------------------------|-------------------------------------|---------------------------------------|---------------------------------------------------|--------------------------|-----------------------|
| Total PA level n (%)            |                                     |                                       |                                                   |                          | <0.001                |
| <600 MET.min/week               | 60 (31.1)                           | 37 (19.4)                             | 22 (15.8)                                         | 169 (62.1)               |                       |
| ≥600 MET.min/week               | 133 (68.9)                          | 154 (80.6)                            | 117 (84.2)                                        | 103 (37.9)               |                       |
| Job-related PA n (%)            |                                     |                                       |                                                   |                          | 0.013                 |
| <600 MET.min/week               | 174 (90.2)                          | 159 (83.2)                            | 125 (89.9)                                        | 252 (92.6)               |                       |
| ≥600 MET.min/week               | 19 (9.8)                            | 32 (16.8)                             | 14 (10.1)                                         | 20 (7.4)                 |                       |
| Transportation-related PA n (%) |                                     |                                       |                                                   |                          | <0.001                |
| <600 MET.min/week               | 185 (95.9)                          | 141 (73.8)                            | 105 (75.5)                                        | 258 (94.9)               |                       |
| ≥600 MET.min/week               | 8 (4.1)                             | 50 (26.2)                             | 34 (24.5)                                         | 14 (5.1)                 |                       |
| Housework-related PA n (%)      |                                     |                                       |                                                   |                          | <0.001                |
| <600 MET.min/week               | 117 (60.6)                          | 119 (62.3)                            | 62 (44.6)                                         | 223 (82.0)               |                       |
| ≥600 MET.min/week               | 76 (39.4)                           | 72 (37.7)                             | 77 (55.4)                                         | 49 (18.0)                |                       |
| Leisure-related PA n (%)        |                                     |                                       |                                                   |                          | <0.001                |
| <600 MET.min/week               | 127 (65.8)                          | 112 (58.6)                            | 59 (42.4)                                         | 235 (86.4)               |                       |
| ≥600 MET.min/week               | 66 (34.2)                           | 79 (41.4)                             | 80 (57.6)                                         | 37 (13.6)                |                       |
| Walking n (%)                   |                                     |                                       |                                                   |                          | <0.001                |
| <600 MET.min/week               | 156 (80.8)                          | 89 (46.6)                             | 73 (52.5)                                         | 230 (84.6)               |                       |
| ≥600 MET.min/week               | 37 (19.2)                           | 102 (53.4)                            | 66 (47.5)                                         | 42 (15.4)                |                       |
| Moderate PA n (%)               |                                     |                                       |                                                   |                          | <0.001                |

|                          |            |            |           |            |        |
|--------------------------|------------|------------|-----------|------------|--------|
| <600 MET.min/week        | 132 (68.4) | 122 (63.9) | 70 (50.4) | 241 (88.6) |        |
| ≥600 MET.min/week        | 61 (31.6)  | 69 (36.1)  | 69 (49.6) | 31 (11.4)  |        |
| Vigorous PA n (%)        |            |            |           |            | <0.001 |
| <600 MET.min/week        | 117 (60.6) | 109 (57.1) | 61 (43.9) | 210 (77.2) |        |
| ≥600 MET.min/week        | 76 (39.4)  | 82 (42.9)  | 78 (56.1) | 62 (22.8)  |        |
| Sitting time (hours/day) |            |            |           |            | <0.001 |
| Tertile 1 = ≤6.29 h      | 50 (28.4)  | 81 (45.8)  | 48 (38.4) | 66 (26.2)  |        |
| Tertile 2 = 6.29-10 h    | 74 (42.0)  | 54 (30.5)  | 48 (38.4) | 85 (33.7)  |        |
| Tertile 3 = >10 h        | 52 (29.5)  | 42 (23.7)  | 29 (23.2) | 101 (40.1) |        |

*p*<0.05 was considered as significant; PA, Physical activity; MET, metabolic equivalent task; Total PA level (MET-minutes/week) = Total physical activity MET-minutes/week = sum of (Job PA + Transportation PA + Housework PA + Leisure PA MET-minutes/week scores).

**Figure S3** showing categories of Total and Leisure PA ( $\geq$  and  $<600$  MET.min/week) according to type of PA during lockdown; participants who practiced both at-home and outdoor activities achieved the highest PA levels,  $p<0.001$  for all

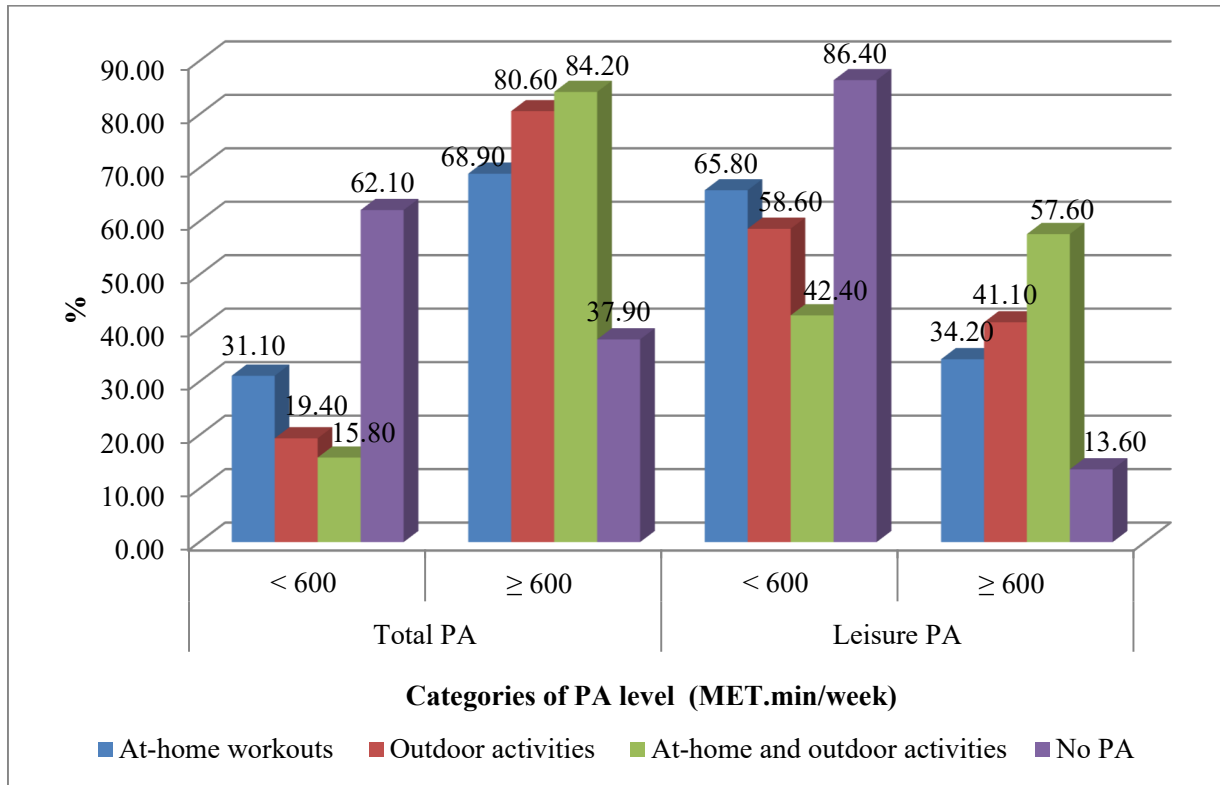

**Table S8. Association between age and type of PA during lockdown**

|                                                     | <23 years  | 23-40 years | ≥40 years | <i>p</i> -value |
|-----------------------------------------------------|------------|-------------|-----------|-----------------|
| <b>Type of PA during lockdown n(%)</b>              |            |             |           | <0.001          |
| At-home workouts                                    | 84 (27.8)  | 62 (25.7)   | 47 (18.7) |                 |
| Outdoor activities<br>(walking, jogging,<br>hiking) | 51 (16.9)  | 47 (19.5)   | 93 (36.9) |                 |
| At-home and<br>outdoor activities                   | 62 (20.5)  | 48 (19.9)   | 29 (11.5) |                 |
| No PA                                               | 105 (34.8) | 84 (34.9)   | 83 (32.9) |                 |

*p*<0.05 was considered as significant; PA, Physical activity
